# Supplementary material for: Seriously Funny or No Laughing Matter?: How Television Viewers Interpret Satires of Legal Themes
Source: Royal Society of Chemistry journal article supplement (doi:10.1039/c3cp44040k), 2010-01-01
Supplement: c3cp44040k.pdf [file c3cp44040k.pdf]

# Interaction of CO<sub>2</sub> with Oxygen Adatoms on Rutile TiO<sub>2</sub>(110)

Xiao Lin,<sup>1</sup> Zhi-Tao Wang,<sup>2</sup> Igor Lyubinetsky,<sup>2</sup> Bruce D. Kay,<sup>1</sup> and Zdenek Dohnálek<sup>1,\*</sup>

*1. Fundamental and Computational Sciences Directorate, Pacific Northwest National  
Laboratory, P.O. Box 999, Richland, WA, 99352, USA*

*2. Environmental Molecular Sciences Laboratory, Pacific Northwest National Laboratory,  
P.O. Box 999, Richland, WA, 99352, USA*

---

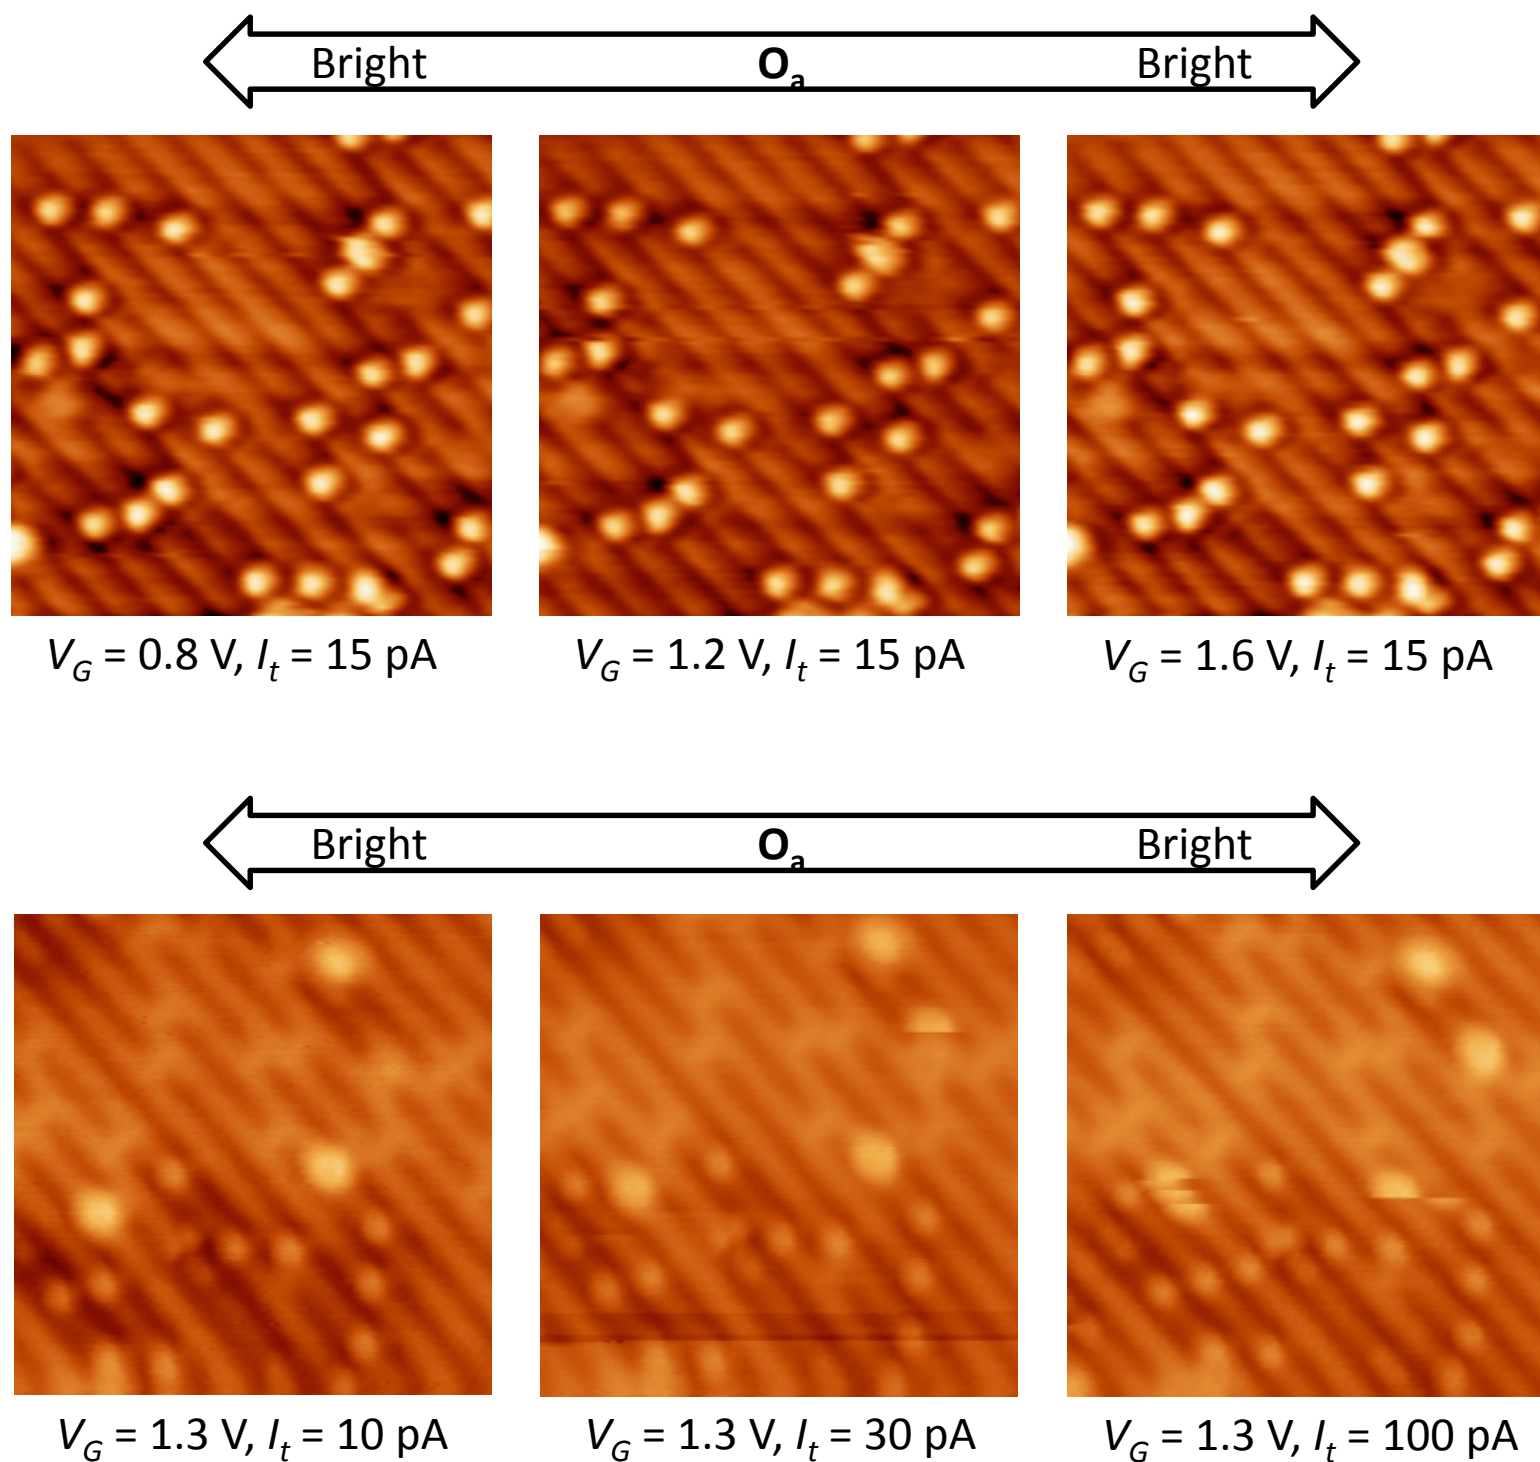

**Figure S1.** STM images ( $8 \times 8 \text{ nm}^2$ ) illustrating the regular bright appearance of oxygen adatoms on  $\text{TiO}_2(110)$  at different tunneling voltages and currents.

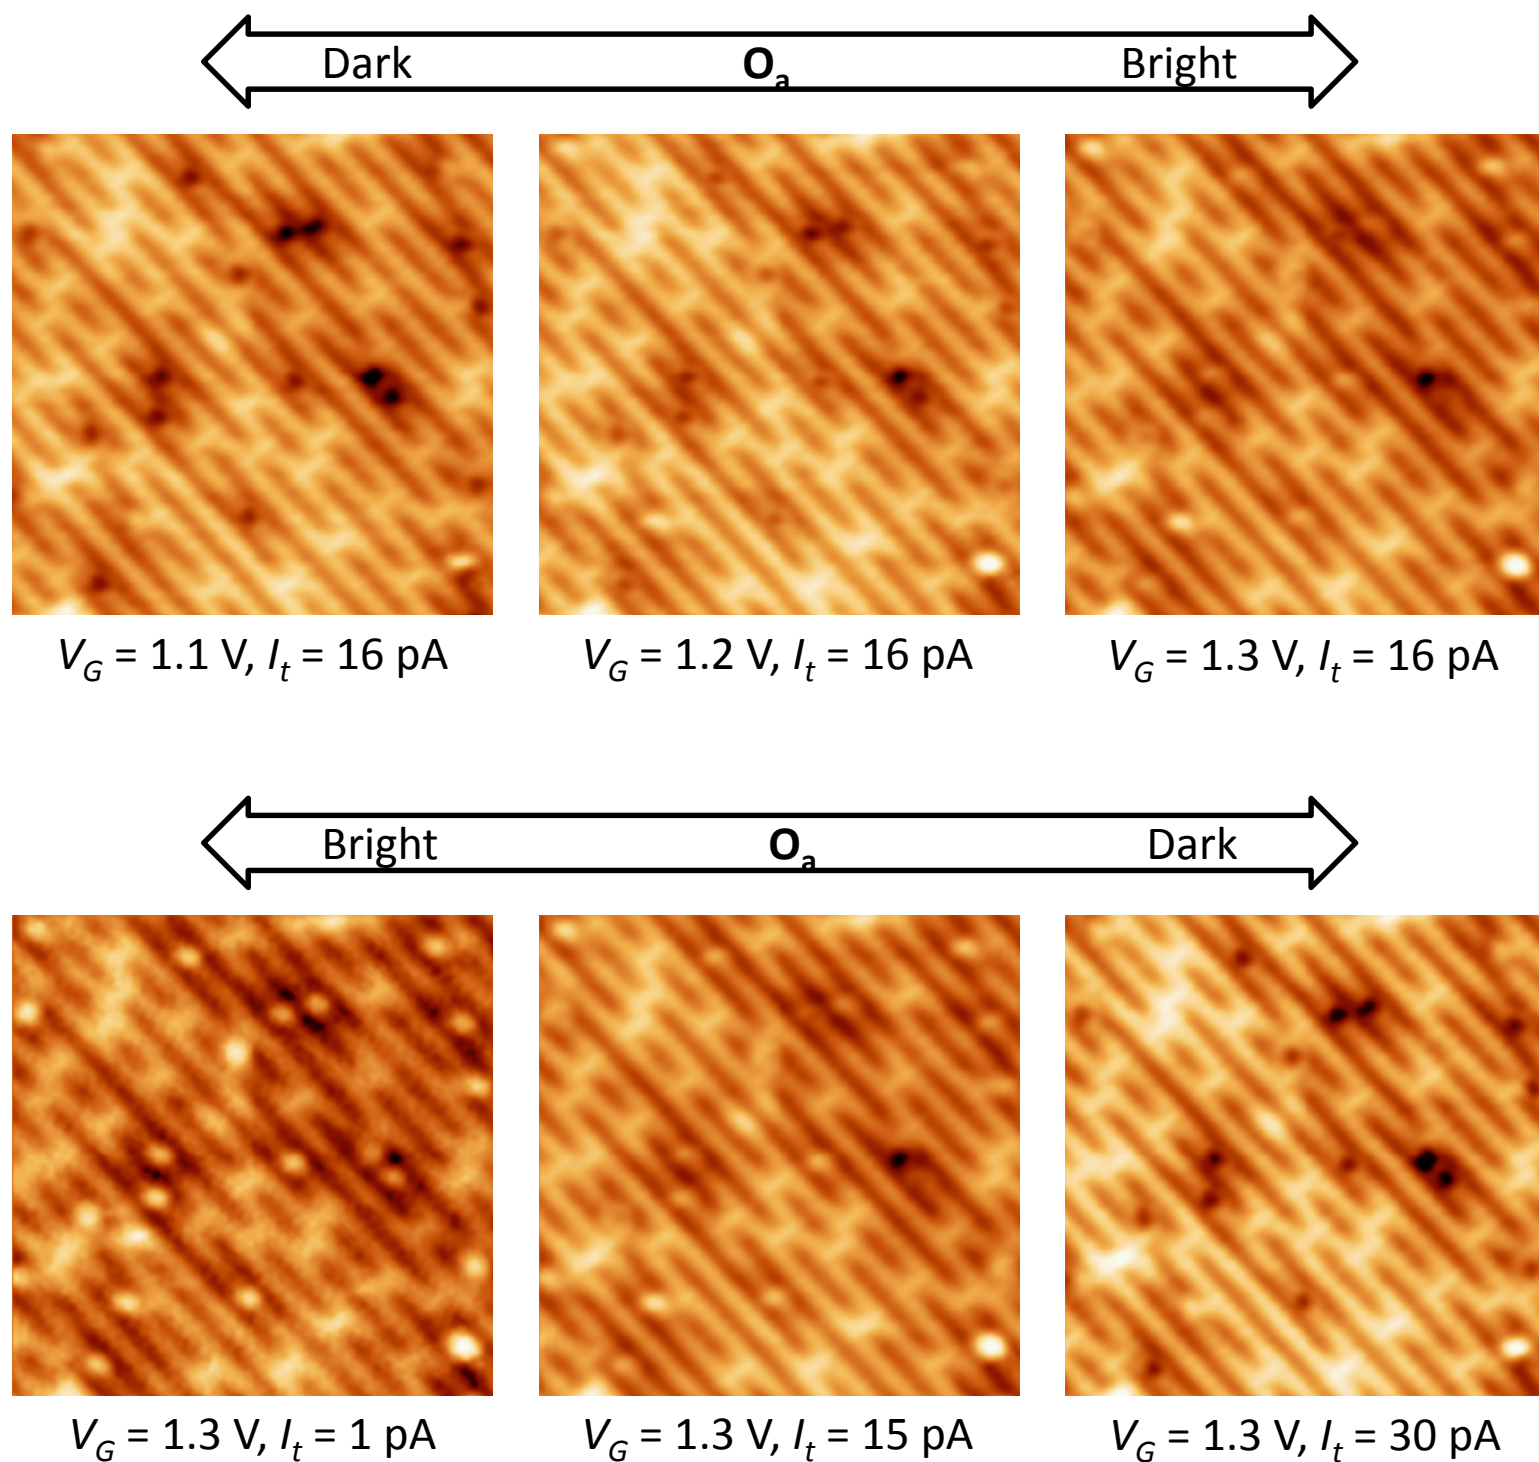

**Figure S2.** STM images ( $10 \times 10 \text{ nm}^2$ ) illustrating the unusual dark appearance of oxygen adatoms on  $\text{TiO}_2(110)$  at low tunneling voltages and high currents after exposing the STM tip to  $\text{CO}_2$ .

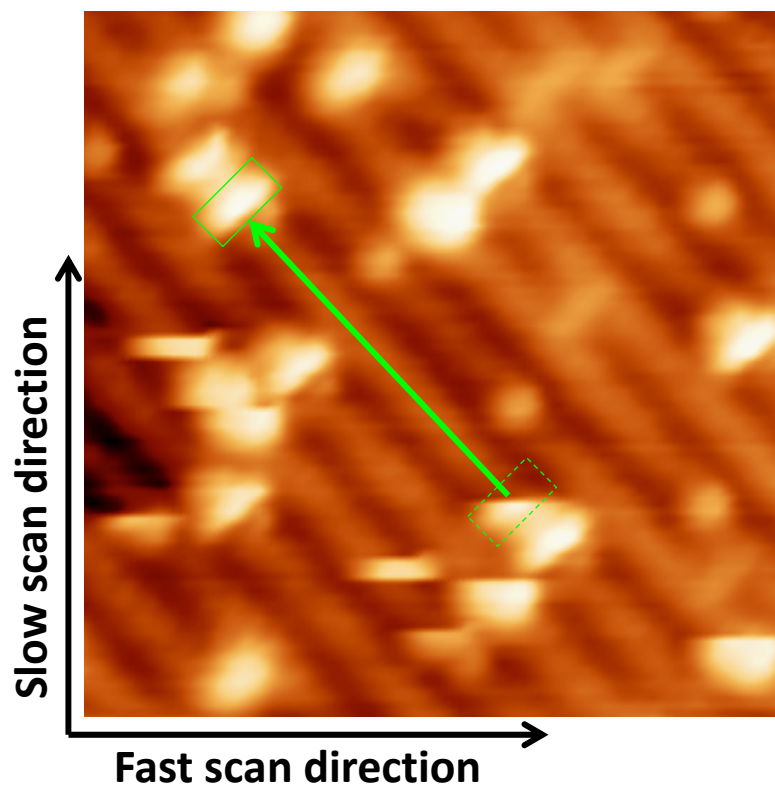

**Figure S3.** STM image illustrating tip-induced diffusion of CO<sub>2</sub> at 20 pA tunneling current (1.4 V, 6.5 × 6.5 nm<sup>2</sup>). The CO<sub>2</sub> molecule diffused from bottom right to top left as indicated by the arrow.
